# Supplementary material
Source: Springer Nature journal article supplement (https://www.springermedizin.de/resource/supplementary/12889_2012_5261_MOESM2_ESM.pdf/9494966)

**a)**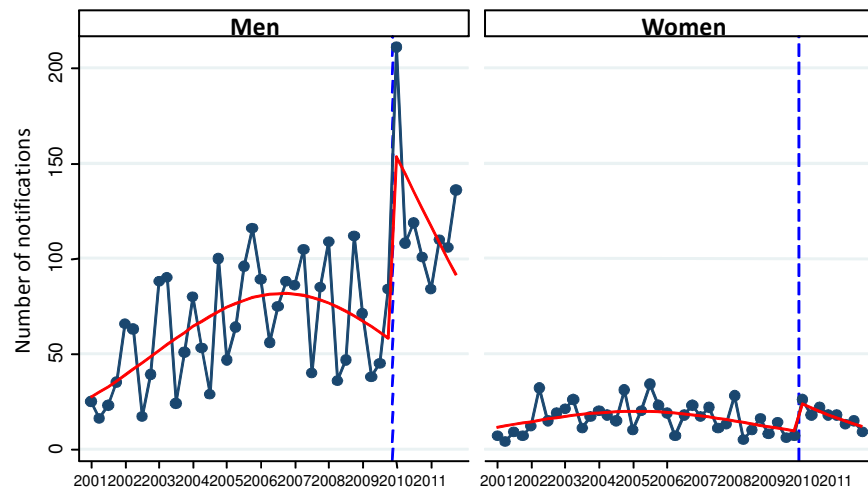**b)**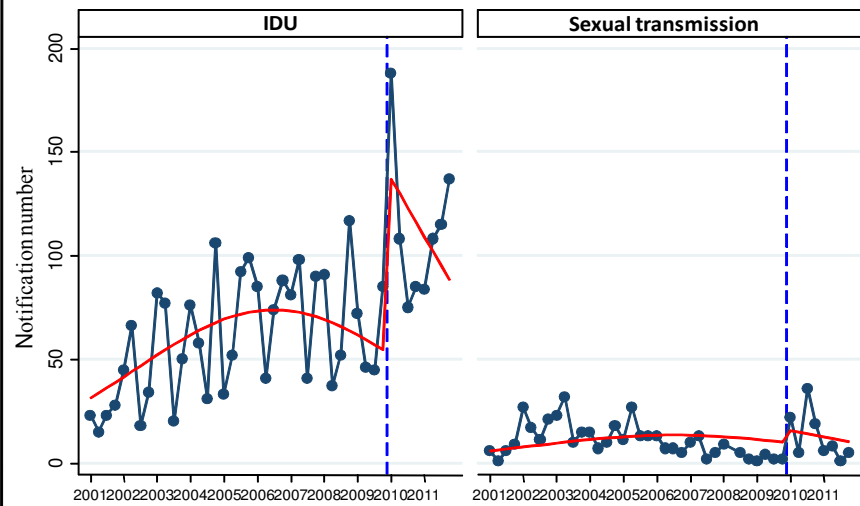**c)**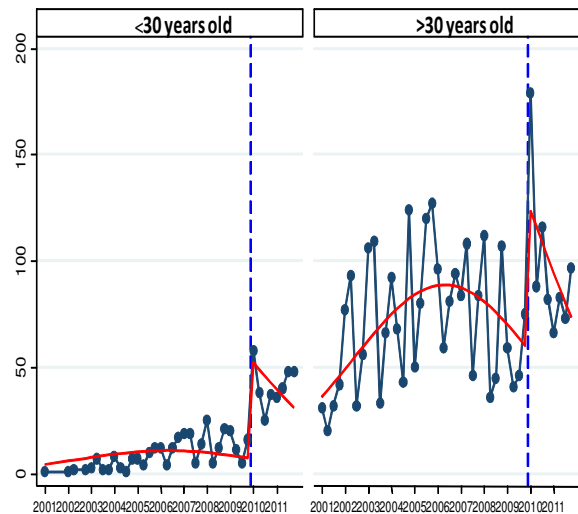**d)**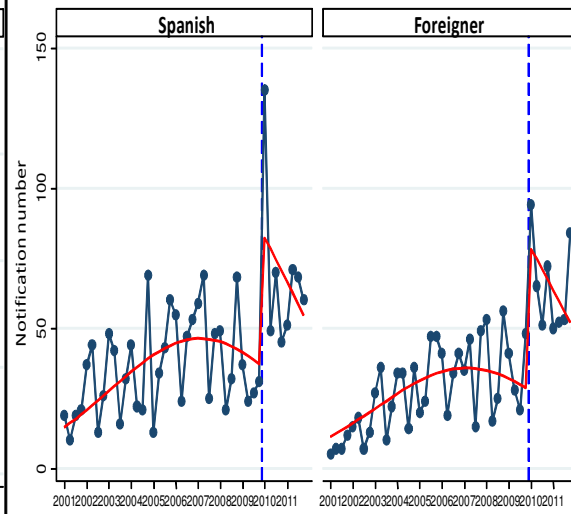**e)**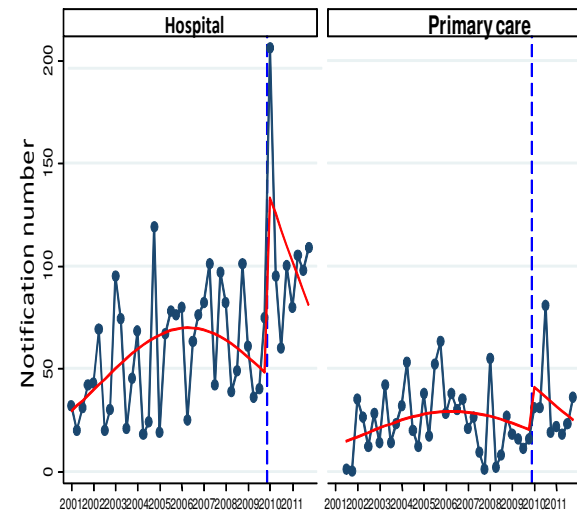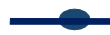

HIV cases

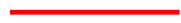

Period effect model

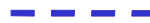

Start of mandatory reporting period

Supplement: MOESM2 [file 9494966]
